# Supplementary material
Source: PubMed Central journal article supplement (PMC2772123)
Supplement: NIHMS149318-supplement-Supp1.pdf [file NIHMS149318-supplement-Supp1.pdf]

## SUPPLEMENTAL MATERIAL

### Supplemental Methods

There were concerns raised<sup>1</sup> and subsequently addressed by the authors<sup>2</sup> about the correlations of the lipoprotein concentrations measured by ion mobility with levels of the apolipoproteins that characterize these particles. Briefly, because concentrations of particles are determined by direct measurement of the particles, accounting for all particle losses during the preparation and routing of samples through the ion mobility system permits calculation of accurate particle concentrations. In the original publication,<sup>3</sup> one aspect of particle loss was not fully accounted for, a diffusional loss that primarily affects the smallest particles (HDL). Correcting for this diffusional loss improved the correlations between the immunologically measured apolipoproteins and the particle concentrations measured by ion mobility.<sup>2</sup> This diffusional loss has been accounted for in all the lipoprotein fractionation data used in this study.

In addition, since the original publication we have carefully re-calibrated the lipoprotein size intervals, based on additional analyses of samples run in the ion mobility system compared to samples run using gradient gel electrophoresis (data not shown). The refined lipoprotein intervals differ somewhat from the original publication and were used in this study (Supplemental Table 1). The inter-assay variation of control material run during these analyses was similar to that originally reported.<sup>3</sup> The coefficient of variation for controls A and B (N=66) run during the course of the ion mobility analysis were: total HDL, 15.0% and 20.7%; peak LDL diameter, 1.1% and 0.8%; total LDL, 17.2% and 17.3%; total non-HDL, 17.3% and 15.7%, respectively.

## Supplemental References

1. Otvos JD, Rudel LL, McConenell JP. Concerns regarding lipoprotein particle measurements by ion mobility analysis. *Clin Chem.* 2008;54:2086-2087.
2. Caulfield MP, Li S, Lee G, Blanche PJ, Salameh WA, Benner WH, Reitz RE, Krauss RM. Concerns regarding lipoprotein particle measurement by ion mobility analysis. In reply. *Clin Chem.* 2008;54:2088-2089.
3. Caulfield MP, Li S, Lee G, Blanche PJ, Salameh WA, Benner WH, Reitz RE, Krauss RM. Direct determination of lipoprotein particle sizes and concentrations by ion mobility analysis. *Clin Chem.* 2008;54:1307-1316.

**Supplemental Table I. Distribution of lipid and lipoprotein measures among 4,594 initially healthy individuals**

| Trait                 | 5th  | 10th | 25th | 50th | 75th | 90th | 95th | Mean | Standard deviation |
|-----------------------|------|------|------|------|------|------|------|------|--------------------|
| HDL-C                 | 0.87 | 0.96 | 1.1  | 1.3  | 1.6  | 1.9  | 2.1  | 1.4  | 0.37               |
| LDL-C                 | 2.7  | 3.0  | 3.5  | 4.1  | 4.8  | 5.5  | 5.9  | 4.2  | 1.0                |
| TG                    | 0.61 | 0.68 | 0.86 | 1.2  | 1.6  | 2.2  | 2.7  | 1.3  | 0.64               |
| HDL-S (7.7-10.5 nm)   | 1207 | 1490 | 2003 | 2658 | 3497 | 4533 | 5454 | 2957 | 1721               |
| HDL-L (10.5-14.5 nm)  | 491  | 596  | 861  | 1380 | 2108 | 3037 | 3602 | 1634 | 1074               |
| LDL-VS (18.0-20.8 nm) | 52.7 | 59.7 | 74.6 | 96.0 | 125  | 165  | 205  | 108  | 55.2               |
| LDL-S (20.8-21.4 nm)  | 29.3 | 34.1 | 43.7 | 58.7 | 85.1 | 151  | 223  | 79.7 | 65.8               |
| LDL-M (21.4-22.0 nm)  | 43.5 | 52.2 | 68.8 | 95.1 | 153  | 240  | 293  | 123  | 80.6               |
| LDL-L (22.0-23.3 nm)  | 205  | 246  | 316  | 414  | 531  | 651  | 744  | 435  | 170                |
| IDL-S (23.3-25.0 nm)  | 83   | 104  | 139  | 194  | 266  | 357  | 420  | 216  | 108                |
| IDL-L (25.0-29.6 nm)  | 63.9 | 72.2 | 89.4 | 112  | 141  | 174  | 198  | 119  | 44.0               |
| VLDL-S (29.6-33.5 nm) | 27.4 | 31.7 | 39.9 | 50.6 | 64.1 | 79.2 | 90.4 | 53.8 | 20.3               |
| VLDL-M (33.5-42.4 nm) | 16.2 | 19.5 | 25.5 | 34.3 | 44.4 | 55.5 | 63.0 | 36.3 | 14.9               |
| VLDL-L (42.4-52.0 nm) | 3.07 | 3.89 | 5.75 | 8.50 | 11.8 | 15.7 | 18.3 | 9.32 | 5.01               |

HDL-C, LDL-C, and TG are in units of mmol/L. The lipoprotein particle concentrations are in units of nmol/L.

**Supplemental Table II. Multivariable-adjusted associations of SNPs to PCs.**

| Chr   | SNP        | Locus                     | Alleles<br>maj/min/<br>MAF | P value              |                      |        |
|-------|------------|---------------------------|----------------------------|----------------------|----------------------|--------|
|       |            |                           |                            | PCA1                 | PCA2                 | PCA3   |
| 2p24  | rs693      | <i>APOB</i>               | A/G/0.48                   | 2.7x10 <sup>-8</sup> | 0.75                 | 0.17   |
| 19q13 | rs4420638  | <i>APOE</i>               | A/G/0.20                   | 8.7x10 <sup>-7</sup> | 0.03                 | 0.94   |
| 19p13 | rs6511720  | <i>LDLR</i>               | G/T/0.10                   | 0.003                | 0.03                 | 0.10   |
| 5q13  | rs12654264 | <i>HMGCR</i>              | A/T/0.39                   | 0.30                 | 0.18                 | 0.36   |
| 1p32  | rs11206510 | <i>PCSK9</i>              | T/C/0.18                   | 0.12                 | 0.31                 | 0.76   |
| 2p21  | rs6544713  | <i>ABCG8</i>              | C/T/0.30                   | 0.72                 | 0.005                | 0.10   |
| 1p13  | rs646776   | <i>CELSR2/PSRC1/SORT1</i> | A/G/0.24                   | 5.7x10 <sup>-5</sup> | 0.65                 | 0.28   |
| 19p13 | rs10401969 | <i>CSPG3</i>              | T/C/0.10                   | 0.43                 | 0.01                 | 0.72   |
| 20q12 | rs6102059  | <i>MAFB</i>               | C/T/0.28                   | 0.94                 | 0.01                 | 0.53   |
| 12q24 | rs2650000  | <i>TCF1</i>               | C/A/0.38                   | 0.29                 | 0.33                 | 0.70   |
| 16q13 | rs1800775  | <i>CETP</i>               | C/A/0.49                   | 0.02                 | 4.2x10 <sup>-5</sup> | 0.0005 |
| 15q22 | rs1800588  | <i>LIPC</i>               | C/T/0.21                   | 0.93                 | 1.0x10 <sup>-9</sup> | 0.69   |
| 18q21 | rs2156552  | <i>LIPG</i>               | A/T/0.18                   | 0.20                 | 0.15                 | 0.89   |
| 9q31  | rs3890182  | <i>ABCA1</i>              | G/A/0.13                   | 0.36                 | 0.60                 | 0.84   |
| 16q22 | rs3785100  | <i>LCAT</i>               | T/C/0.14                   | 0.57                 | 0.53                 | 0.10   |
| 12q24 | rs2338104  | <i>MVK</i>                | G/C/0.47                   | 0.53                 | 0.86                 | 0.60   |
| 1q42  | rs4846914  | <i>GALNT2</i>             | A/G/0.40                   | 0.37                 | 1.9x10 <sup>-5</sup> | 0.42   |
| 9p22  | rs471364   | <i>TTC39B</i>             | T/C/0.11                   | 0.83                 | 0.18                 | 0.22   |
| 20q13 | rs1800961  | <i>HNF4A</i>              | C/T/0.04                   | 0.43                 | 0.15                 | 0.04   |
| 19p13 | rs2967605  | <i>ANGPTL4</i>            | C/T/0.17                   | 0.54                 | 0.73                 | 0.05   |
| 1p31  | rs12130333 | <i>ANGPTL3</i>            | C/T/0.22                   | 0.60                 | 0.90                 | 0.74   |
| 2p23  | rs1260326  | <i>GCKR</i>               | C/T/0.36                   | 0.16                 | 0.005                | 0.24   |
| 8q24  | rs17321515 | <i>TRIB1</i>              | A/G/0.49                   | 0.01                 | 0.02                 | 0.29   |
| 7q11  | rs17145738 | <i>MLXIPL</i>             | C/T/0.13                   | 0.04                 | 8.6x10 <sup>-7</sup> | 0.85   |
| 8p23  | rs7819412  | <i>XKR6</i>               | A/G/0.49                   | 0.79                 | 0.50                 | 0.05   |
| 11q23 | rs3133506  | <i>APOA1/A5</i>           | T/G/0.07                   | 0.004                | 6.9x10 <sup>-5</sup> | 0.40   |
| 8p21  | rs328      | <i>LPL</i>                | C/G/0.09                   | 0.002                | 7.2x10 <sup>-6</sup> | 0.04   |
| 20q13 | rs7679     | <i>PLTP</i>               | T/C/0.19                   | 0.10                 | 0.14                 | 0.50   |
| 11q12 | rs174548   | <i>FADS1</i>              | C/G/0.31                   | 0.08                 | 0.01                 | 0.82   |

P values shown are adjusted for age, gender, and diabetes status. The major allele, minor allele, and minor allele frequency (MAF) for each SNP is indicated; all modeling was performed with the major allele as the reference allele.
